**Table S1.** Spearman’s rank correlations between replicates within treatments. *P*-values were corrected for multiple comparisons.

|                       | <b>RIL-D48</b>     |            |                     |            | <b>RIL-SH2</b>     |            |                     |            |  |
|-----------------------|--------------------|------------|---------------------|------------|--------------------|------------|---------------------|------------|--|
|                       | <i>Low density</i> |            | <i>High density</i> |            | <i>Low density</i> |            | <i>High density</i> |            |  |
|                       | <i>HH</i>          | <i>NHH</i> | <i>HH</i>           | <i>NHH</i> | <i>HH</i>          | <i>NHH</i> | <i>HH</i>           | <i>NHH</i> |  |
| <b><i>Females</i></b> |                    |            |                     |            |                    |            |                     |            |  |
| R1 – R2               | 0.27               | 0.95*      | 0.20                | 0.32       | 0.26               | -0.48      | 0.58                | -0.09      |  |
| R1 – R3               | 0.42               | 0.83*      | 0.40                | 0.26       | 0.16               | -0.44      | 0.18                | 0.25       |  |
| R2 – R3               | 0.29               | 0.88*      | 0.28                | 0.38       | 0.63               | 0.35       | 0.28                | 0.14       |  |
| <b><i>Males</i></b>   |                    |            |                     |            |                    |            |                     |            |  |
| R1 – R2               | 0.24               | 0.99*      | 0.30                | 0.09       | -0.11              | -0.18      | -0.36               | 0.64       |  |
| R1 – R3               | 0.15               | 0.86*      | 0.30                | 0.37       | 0.38               | -0.23      | 0.23                | 0.42       |  |
| R2 – R3               | 0.38               | 0.86*      | -0.06               | 0.08       | 0.35               | 0.31       | 0.07                | 0.55       |  |

\**P* < 0.05.

**Table S2.** QTL for heat-stress survival identified by composite interval mapping in adults of *Drosophila melanogaster* with some of the candidates genes that are located within the QTL range.

| Chrom. | QTL Range  | Candidates genes                                                                                                                                                                                                                                                                                                                                                                                                                                                               |
|--------|------------|--------------------------------------------------------------------------------------------------------------------------------------------------------------------------------------------------------------------------------------------------------------------------------------------------------------------------------------------------------------------------------------------------------------------------------------------------------------------------------|
|        | 1B8-3C6    | <u>CG14629</u> , <u>CG11378</u> , period, CG14804, CG2694                                                                                                                                                                                                                                                                                                                                                                                                                      |
| X      | 4F1-10A2   | CG3203, CG2186, <u>CG11700</u> , <u>CG14439</u> , Trxr-1, flapwing, <u>CG32687</u> , CG2887, <u>CG5966</u> , <u>CG1583</u> , <u>vermilion</u> , <u>CG2254</u> , <u>CG12116</u> , <u>Reg-3</u> , <u>CG3106</u>                                                                                                                                                                                                                                                                  |
|        | 10A2-12E   | CG1841, CG15737, Rbp1-like, hop, Hsc70-3, <u>CG15201</u> , Hsp60                                                                                                                                                                                                                                                                                                                                                                                                               |
|        | 12D-16F6   | RpS19, CG8289, Ucp4A, rut, <u>CG33173</u> , <u>CG9673</u> , <u>CG9675</u>                                                                                                                                                                                                                                                                                                                                                                                                      |
|        | 21C3-26A   | Lwr, dock, CG5156, CG3210, <u>Thor</u> , <u>CG3246</u> , TotM, Hsp60B, CG5001, <u>Iris</u> , <u>CG17224</u> , <u>CG3244</u> , <u>Cyp4ac2</u>                                                                                                                                                                                                                                                                                                                                   |
|        | 28A1-30A6  | Acer, <u>Glutactin</u> , <u>Uro</u> , <u>CG18585</u> , <u>CG7025</u> , <u>TepII</u> , <u>CG13095</u> , <u>CG9466</u> , <u>CG9468</u> , <u>Cyp4d21</u>                                                                                                                                                                                                                                                                                                                          |
| 2      | 30A3-42A   | cdc2, CG5384, CG6579, Idgf1, CG12288, Cyt-c-p, VhaSFD, CG15141, tj, CG13084, <u>CG7300</u> , <u>CG5945</u> , <u>CG9928</u> , <u>CG7916</u> , <u>CG8997</u> , <u>CG7953</u> , TotF, Dif, dl, TotE, <u>CG13086</u> , <u>CG10189</u> , <u>CG10680</u> , <u>CG16887</u> , <u>CG17108</u> , Hsp60D, DnaJ-H, ref(2)P, <u>CG10383</u> , <u>CG5390</u> , <u>CG16743</u> , <u>hgo</u> , <u>CG14935</u> , <u>CG6012</u> , <u>Irk3</u> , <u>CG10026</u> , <u>CG17124</u> , catsup, Trap1. |
|        | 42A-50C    | CG3409, pnut, Ggamma1, Trap1, CG8235, Su(var)2-10, CG8520, CG13322, CG17724, <u>CG3270</u> , <u>CG1946</u> , <u>CG2065</u> , <u>CG12374</u> , <u>CG30359</u> , <u>LvpH</u> , <u>iotaTry</u> , <u>CG30502</u> , <u>CG7882</u> , <u>CG8693</u> , <u>lambdaTry</u> , <u>sug</u> , <u>CG30035</u> , <u>CG1809</u> , <u>Cyp6a13</u> , <u>LvpL</u> , <u>CG9080</u> , <u>CG8834</u>                                                                                                   |
|        | 50C-56E6   | Cyp6a22, Ric, Ef1beta, Ark, CG9646, EDTP, CG4989, betaTub56D, <u>CG18327</u> , <u>CG8317</u> , <u>CG6426</u> , Heat shock factor, <u>CG17522</u> , Hsc70-5, <u>GstE1</u> , <u>Gst3-2</u> , <u>Pepck</u> , <u>CG8093</u> , <u>CG8249</u> , <u>CG4847</u> , <u>CG6484</u> , <u>Jheh3</u> , <u>Obp56a</u> , <u>CG15065</u>                                                                                                                                                        |
|        | 56D11-59A2 | CG4266, CG15675, CG11296, <u>CG16898</u> , CG16799, <u>Xbp1</u> , <u>CG13492</u> , <u>CG11200</u> , <u>Obp57c</u> , <u>CG16799</u>                                                                                                                                                                                                                                                                                                                                             |
|        | 62A-63F1   | Cdc37, Hsp90, CG12020, <u>Hsp83</u> , <u>CG16762</u> , <u>CG16985</u> , <u>CG16986</u> , <u>Cct1</u>                                                                                                                                                                                                                                                                                                                                                                           |
| 3      | 63D2-66E2  | RpL14, DnaJ-1, <u>CG6602</u> , CG7409, CG7387, <u>CG6781</u> , <u>CG10592</u> , <u>CG5150</u> , <u>CG10477</u> , <u>CG10472</u> , <u>CG5804</u> , <u>CG13309</u> , <u>ImpL3</u> , <u>CG8562</u> , <u>CG8560</u>                                                                                                                                                                                                                                                                |
|        | 90B1-95C8  | CG17752, CG10825, RpS3, TotA, TotB, TotC, TotX, TotZ, Hsr-omega, <u>CG5791</u> , <u>CG6660</u> , <u>CG31148</u> , <u>CG17836</u> , <u>CG3734</u> , <u>CG5023</u> , <u>CG3301</u> , <u>CG6726</u> , <u>CG6733</u> , <u>CG18493</u> , <u>CG3739</u> , <u>CG13833</u>                                                                                                                                                                                                             |
|        | 97F-99D9   | CG12881, Ef1gamma, CG7601, <u>Obp99b</u> , <u>Cyp6a18</u> , <u>CG14527</u> , <u>CG3348</u> , <u>CG14528</u> , <u>CG9682</u>                                                                                                                                                                                                                                                                                                                                                    |

Underlined genes were heat up-regulated and doubly underlined were down-regulated in previous studies (Sørensen *et al.*, 2005).

References:

Sørensen, J. G., Nielsen, M. M., Kruhoffer, M., Justesen, J. and Loeschcke, V. (2005). Full genome gene expression analysis of the heat stress response in *Drosophila melanogaster*. Cell Stress Chaperones 10, 312-328.

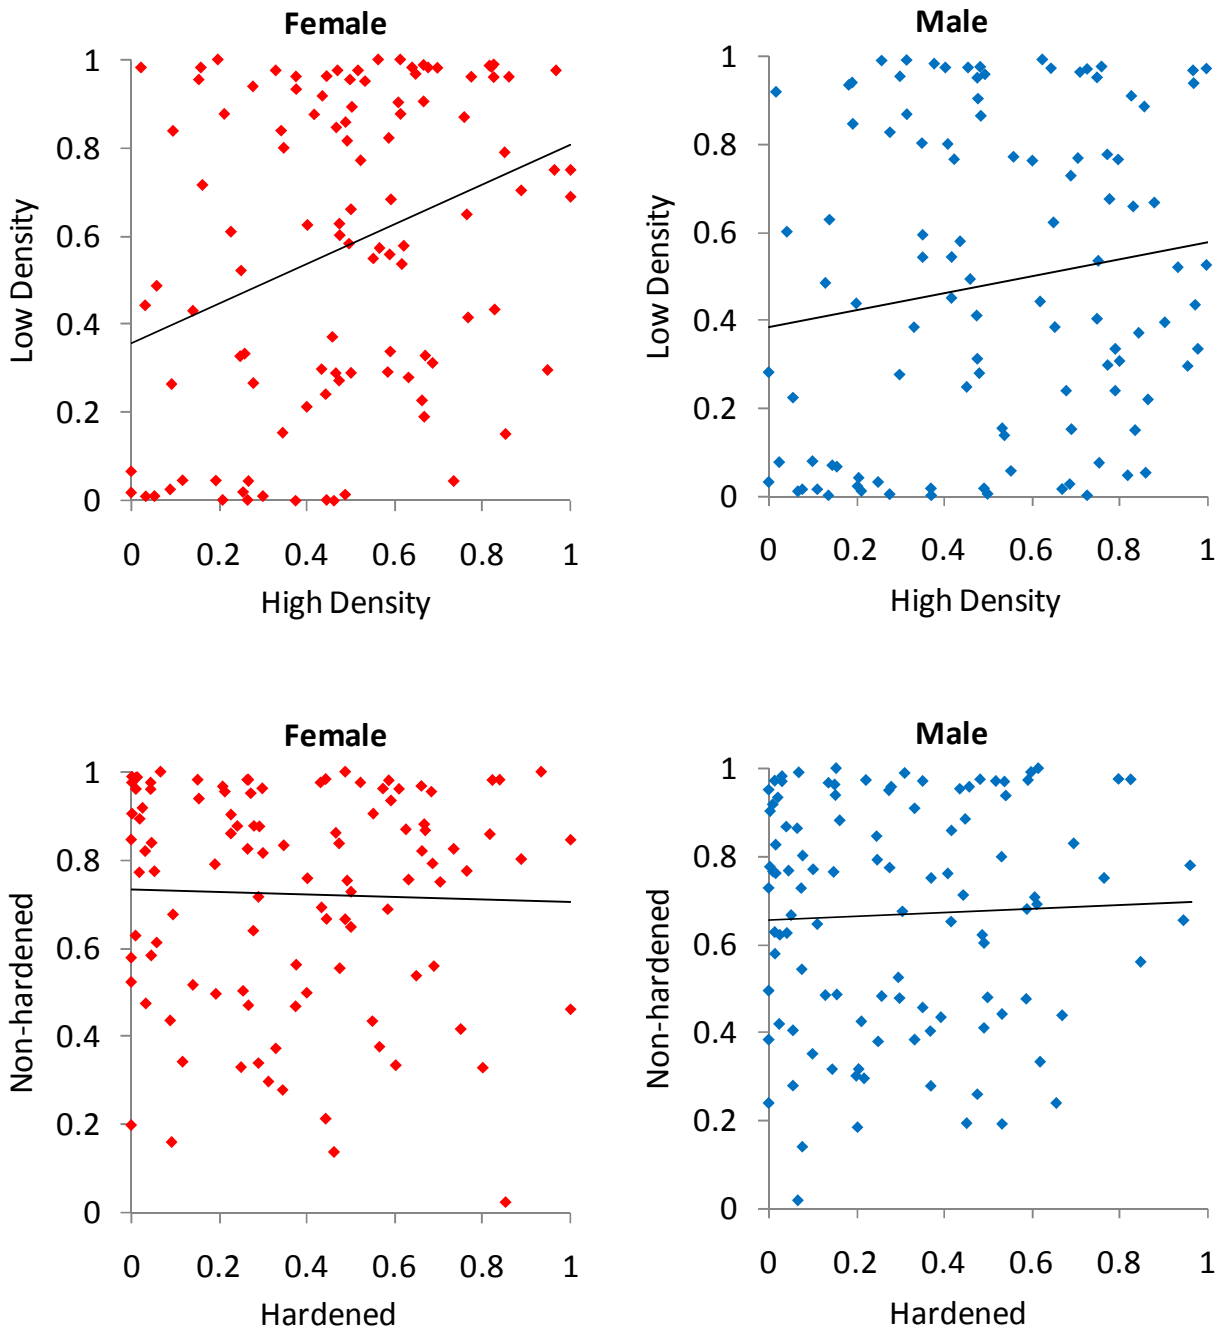

**Figure S1.** Heat-stress survival (HSS) is plotted for low versus high density. Spearman’s rank correlations between low and high density are:  $r_s = 0.32^{**}$  and 0.1515 for females and males, respectively. Spearman’s rank correlations between heat-hardened and non-hardened SHS are:  $r_s = 0.0505$  and 0.0303 for females and males, respectively.

**a) Females from RIL-D48 at high density**

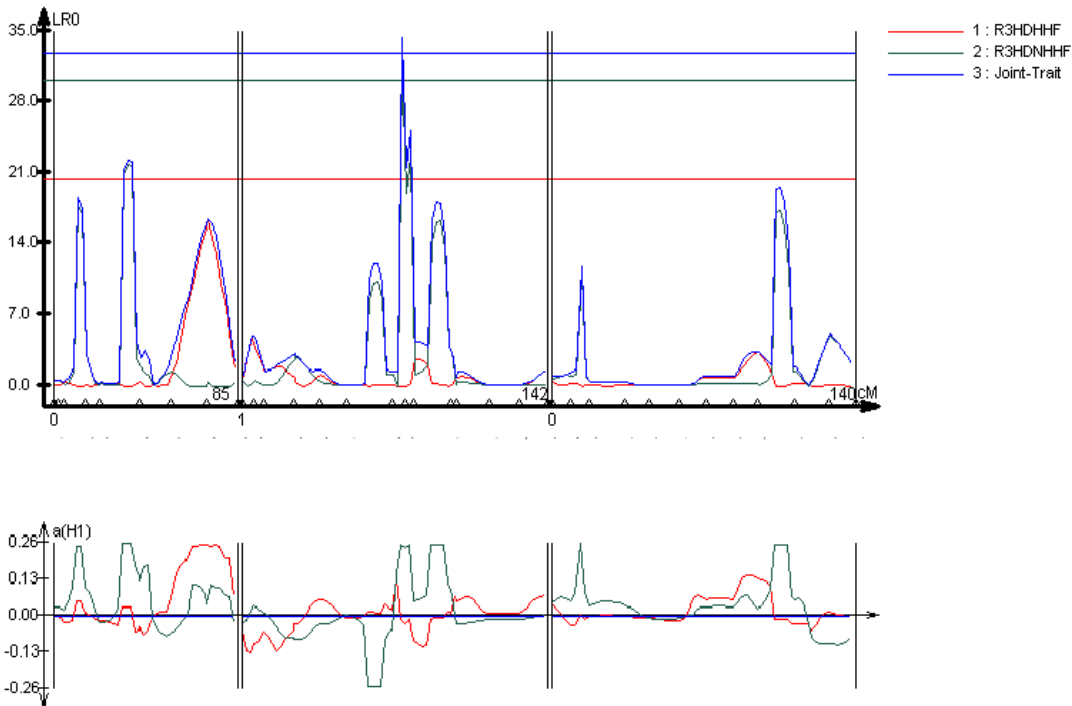

**b) Males from RIL-D48 at high density**

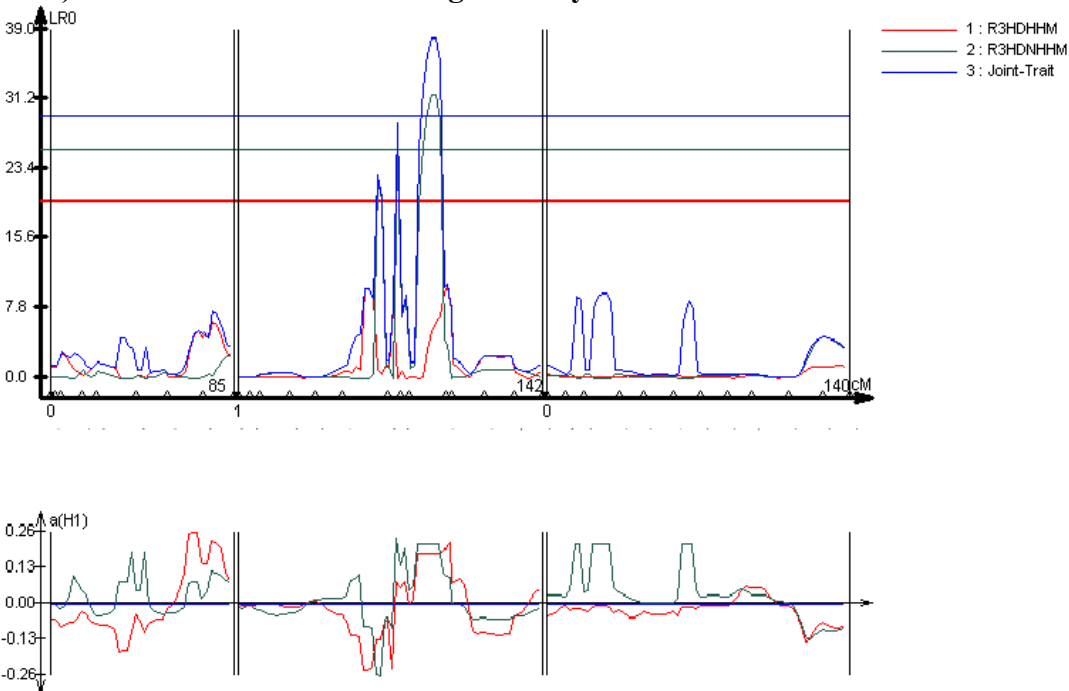

**Figure S2.** Plots of likelihood ratio (LR) scores against map position (in cM) from multi-trait composite interval mapping (MCIM) are shown for survival to heat stress in all cases where MCIM indicated significant QTL for heat-hardened versus non-hardened flies. Results were significant only for replicate 3 in females (a) and males (b) from RIL-D48 at high density. Significance thresholds were determined by 1000 random permutations. Triangles on the x-axis correspond to the location of markers used in MCIM. Additive values [a(H1)] are shown as profiles below the panel for LR profiles.

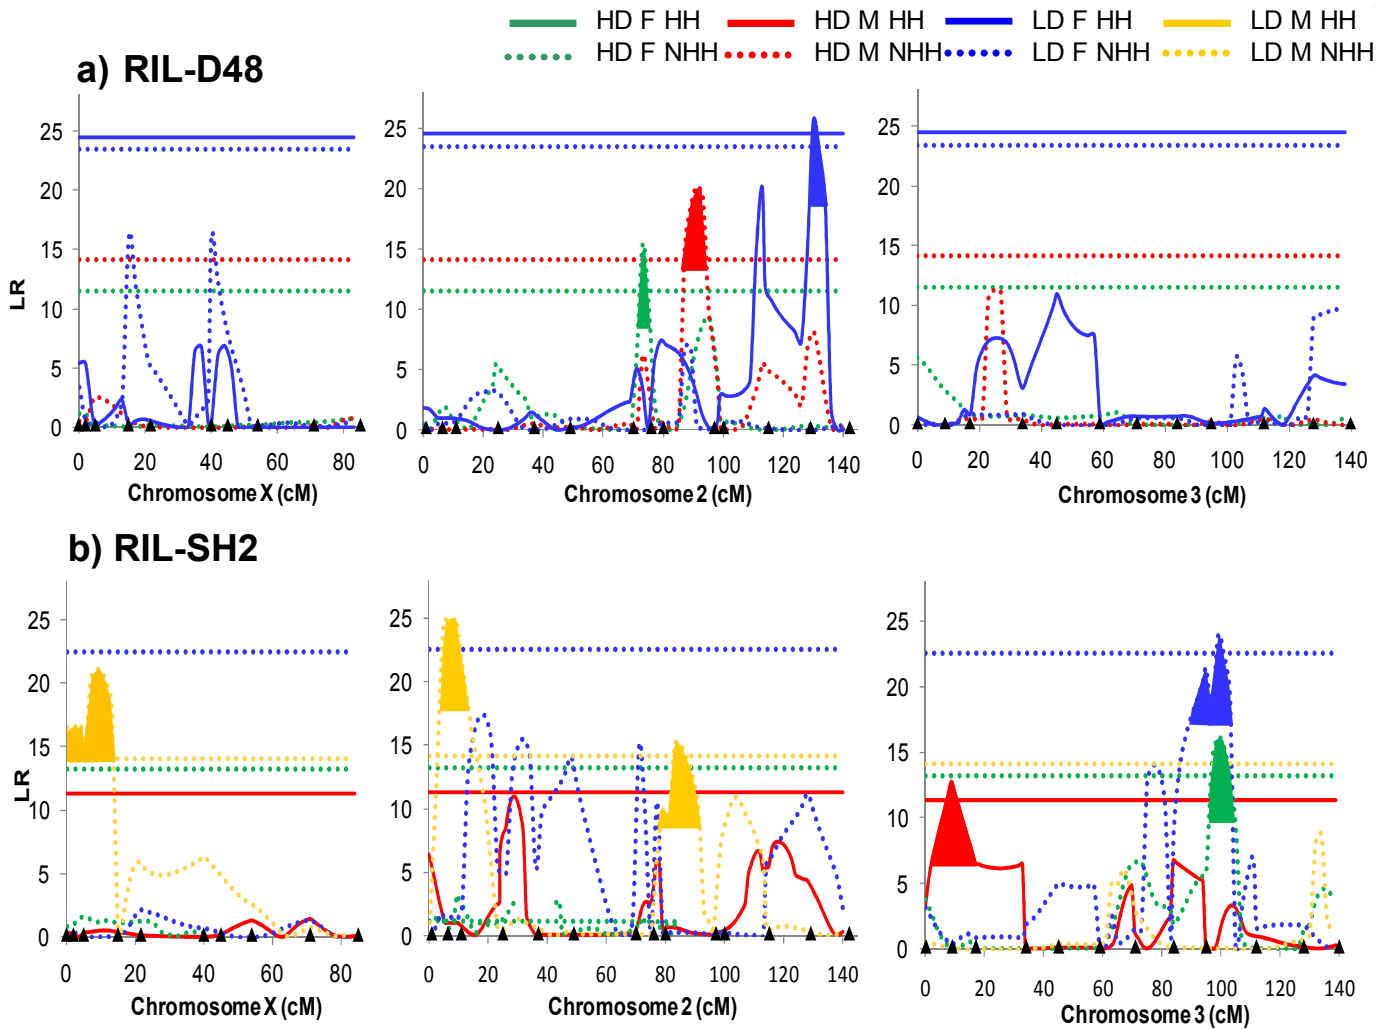

**Figure S3.** Plot of likelihood ratio (LR) scores against map position (in cM) from composite interval mapping for survival to heat stress is shown for an analysis pooling all replicates (R1, R2, R3) in RIL-D48 (a) and RIL-SH2 (b). The analyses were performed for heat-hardened (HH) and non-hardened (NHH) flies at either high (HD) and low (LD) density in both females (F) and males (M). Significance thresholds were determined by 1000 random permutations (horizontal lines). To avoid overlapping of lines of LR scores, only cases that were significant are shown.
